# Supplementary material for: Profiling Analysis of Volatile and Non-volatile Compounds in Vitis Vinifera Berries (cv. Chardonnay) and Spontaneous Bud Mutation
Source: Front Nutr. 2021 Aug 6;8:715528. doi: 10.3389/fnut.2021.715528 (PMC8378792; doi:10.3389/fnut.2021.715528)
Supplement: Supplementary file 5 [file Table_5.xlsx]

## Sheet: Bpulp.vs.Cpulp_neg
Table S5 KEGG enrichment analysis of differential metabolites
MapID	MapTitle	Pvalue	x	y	n	N	EnrichDirect	MetaIDs	kegg_cpd_id
map00330	Arginine and proline metabolism	0.0357143	1	2	1	56	Over	Com_136_neg	cpd:C01877

## Sheet: Bpulp.vs.Cpulp_pos
Table S5 KEGG enrichment analysis of differential metabolites
MapID	MapTitle	Pvalue	x	y	n	N	EnrichDirect	MetaIDs	kegg_cpd_id
map00410	beta-Alanine metabolism	0.0171721	2	4	5	82	Over	Com_2841_pos Com_317_pos	cpd:C00750,cpd:C00315
map00480	Glutathione metabolism	0.0171721	2	4	5	82	Over	Com_2841_pos Com_317_pos	cpd:C00750,cpd:C00315
map00330	Arginine and proline metabolism	0.0407782	2	6	5	82	Over	Com_2841_pos Com_317_pos	cpd:C00750,cpd:C00315
map00220	Arginine biosynthesis	0.11894	1	2	5	82	Over	Com_1866_pos	cpd:C00327
map00590	Arachidonic acid metabolism	0.11894	1	2	5	82	Over	Com_2285_pos	cpd:C05963
map02010	ABC transporters	0.322902	1	6	5	82	Over	Com_317_pos	cpd:C00315
map01230	Biosynthesis of amino acids	0.367448	1	7	5	82	Over	Com_1866_pos	cpd:C00327
map01100	Metabolic pathways	0.37172	4	45	5	82	Over	Com_1866_pos Com_2285_pos Com_2841_pos Com_317_pos	cpd:C00327,cpd:C05963,cpd:C00750,cpd:C00315
map00940	Phenylpropanoid biosynthesis	0.409618	1	8	5	82	Over	Com_317_pos	cpd:C00315
map00941	Flavonoid biosynthesis	0.487214	1	10	5	82	Over	Com_596_pos	cpd:C09099

## Sheet: Bskin.vs.Cskin_neg
Table S5 KEGG enrichment analysis of differential metabolites
MapID	MapTitle	Pvalue	x	y	n	N	EnrichDirect	MetaIDs	kegg_cpd_id
map00600	Sphingolipid metabolism	0.0178571	1	1	1	56	Over	Com_232_neg	cpd:C00065
map00920	Sulfur metabolism	0.0178571	1	1	1	56	Over	Com_232_neg	cpd:C00065
map00460	Cyanoamino acid metabolism	0.0357143	1	2	1	56	Over	Com_232_neg	cpd:C00065
map01502	Vancomycin resistance	0.0357143	1	2	1	56	Over	Com_232_neg	cpd:C00065
map00260	Glycine, serine and threonine metabolism	0.0535714	1	3	1	56	Over	Com_232_neg	cpd:C00065
map00261	Monobactam biosynthesis	0.0535714	1	3	1	56	Over	Com_232_neg	cpd:C00065
map00270	Cysteine and methionine metabolism	0.0714286	1	4	1	56	Over	Com_232_neg	cpd:C00065
map00970	Aminoacyl-tRNA biosynthesis	0.0714286	1	4	1	56	Over	Com_232_neg	cpd:C00065
map01230	Biosynthesis of amino acids	0.0892857	1	5	1	56	Over	Com_232_neg	cpd:C00065
map00630	Glyoxylate and dicarboxylate metabolism	0.107143	1	6	1	56	Over	Com_232_neg	cpd:C00065
map01200	Carbon metabolism	0.107143	1	6	1	56	Over	Com_232_neg	cpd:C00065
map02010	ABC transporters	0.125	1	7	1	56	Over	Com_232_neg	cpd:C00065
map01110	Biosynthesis of secondary metabolites	0.303571	1	17	1	56	Over	Com_232_neg	cpd:C00065
map01100	Metabolic pathways	1	1	32	1	56	Over	Com_232_neg	cpd:C00065

## Sheet: Bskin.vs.Cskin_pos
Table S5 KEGG enrichment analysis of differential metabolites
MapID	MapTitle	Pvalue	x	y	n	N	EnrichDirect	MetaIDs	kegg_cpd_id
map00300	Lysine biosynthesis	0.0365854	1	1	3	82	Over	Com_2582_pos	cpd:C00449
map00945	Stilbenoid, diarylheptanoid and gingerol biosynthesis	0.0365854	1	1	3	82	Over	Com_242_pos	cpd:C03582
map00310	Lysine degradation	0.107057	1	3	3	82	Over	Com_2582_pos	cpd:C00449
map00360	Phenylalanine metabolism	0.206188	1	6	3	82	Over	Com_3744_pos	cpd:C02137
map01230	Biosynthesis of amino acids	0.237523	1	7	3	82	Over	Com_2582_pos	cpd:C00449
map01110	Biosynthesis of secondary metabolites	0.579268	2	36	3	82	Over	Com_242_pos Com_2582_pos	cpd:C03582,cpd:C00449
